# Supplementary material for: Year-to-year correlation, record length, and overconfidence in wind resource assessment
Source: Copernicus journal article supplement (doi:10.5194/wes-1-115-2016), 2016-08-24
Supplement: Supplementary file 1 [file wes-1-115-2016-supplement.zip]

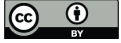

## *Supplement of*

# **Year-to-year correlation, record length, and overconfidence in wind resource assessment**

**Nicola Bodini et al.**

*Correspondence to:* Mark Handschy ([mark.handschy@colorado.edu](mailto:mark.handschy@colorado.edu))

- [wes-1-115-2016-supplement-title-page.pdf](#)
- [StationsSummary2.csv](#)
- [ycf.csv](#)
- [ywts.csv](#)

The copyright of individual parts of the supplement might differ from the CC-BY 3.0 licence.
